# Supplementary material for: Host–guest interactions in a series of self-assembled As2L2Cl2 macrocycles
Source: Royal Society of Chemistry journal article supplement (doi:10.1039/b802178c), 2008-01-01
Supplement: b802178c.pdf [file b802178c.pdf]

## Host-guest interactions in a series of self-assembled As<sub>2</sub>L<sub>2</sub>Cl<sub>2</sub> macrocycles

Virginia M. Cangelosi, Lev N. Zakharov, Sean A. Fontenot, Melanie A. Pitt, and Darren W. Johnson

### *Supplementary Information*

#### **Synthesis:**

<sup>1</sup>H NMR spectra were measured using a Varian INOVA-300 spectrometer operating at 299.935 MHz. *J* values are given in Hz. Commercially available reagents were used as received.

**4,4'-bis(mercaptomethyl)biphenyl (H<sub>2</sub>1).** Procedure is modified from that which was previously reported.<sup>1</sup> 4,4'-bis(chloromethyl)biphenyl (2.00 g, 7.96 mmol) was dissolved in solution of absolute ethanol (30 mL) and acetone (4 mL). Thiourea (1.31 g, 17.2 mmol) was added and the solution was heated to reflux for 3 hours. The off-white precipitate was filtered, washed with acetone, and dried under vacuum (3.01g, 7.46 mmol, 93%). A 3-neck round bottom flask was charged with this precipitate (1.04 g, 2.58 mmol), equipped with a stir bar and condenser, and placed under a N<sub>2</sub> atmosphere. Degassed 2M NaOH (30 mL) was added via cannula and the mixture was heated to 80 °C for 4 hours. The cloudy solution was cooled to room temperature and degassed 4M HCl (20 mL) was added via cannula. Precipitate formed as the acid was added and pH paper was used to verify that the solution was acidic (pH < 3). The reaction mixture was extracted with CH<sub>2</sub>Cl<sub>2</sub> (3 × 20 mL) and the combined organics were dried over sodium sulfate and evaporated to dryness to yield a white powder (373 mg, 1.51 mmol, 59%). δ<sub>H</sub>(300 MHz; CDCl<sub>3</sub>; Me<sub>4</sub>Si) 7.54 (d, 4 H, CH, *J* 4.5), 7.39 (d, 4 H, CH, *J* 7.8), 3.79 (d, 4 H, CH<sub>2</sub>, *J* 7.5), 1.80 (t, 2 H, SH, *J* 7.5); δ<sub>C</sub>(75 MHz; CDCl<sub>3</sub>) 140.4, 139.7, 128.6, 127.5, 28.9, which matched the values reported in the literature.

**1,4-dimethoxy-2,5-bis(mercaptomethyl)benzene (H<sub>2</sub>3).** Procedure is modified from that which was previously reported.<sup>2</sup> 1,4-bis(methoxy)-2,5-bis(chloromethyl)benzene (251 mg, 1.07 mmol) and thiourea (275 mg, 3.62 mmol) were heated to reflux in acetone (40 mL) for 4 h. The solvent was evaporated to yield an off-white salt. The salt was transferred to a 3-neck round-bottom flask and placed under N<sub>2</sub>. Degassed 2M NaOH (50 mL) was transferred via cannula onto the salt and the solution was stirred under N<sub>2</sub> at 80 °C for 7 h. This solution was acidified using 6M HCl under N<sub>2</sub>, then extracted with CH<sub>2</sub>Cl<sub>2</sub> (4 x 20 mL). The organic layer was washed with water (25 mL) and brine (25 mL) and the solvent was evaporated to yield a white solid (120 mg, 0.521 mmol, 49%). δ<sub>H</sub>(300 MHz; CDCl<sub>3</sub>; Me<sub>4</sub>Si) 6.81 (s, 2 H, CH), 3.85 (s, 6 H, CH<sub>3</sub>), 3.71 (d, 4 H, CH<sub>2</sub>, *J* 7.9), 1.96 (t, 2 H, SH, *J* 7.9), which matched the values reported in the literature.

#### **Volume Calculations using GRASP<sup>3</sup>:**

The cavity volume of the [(As<sub>2</sub>3<sub>2</sub>Cl<sub>2</sub>)<sub>2</sub>·toluene] dimer was also calculated using the software package GRASP and found to be 164 Å<sup>3</sup>. The large apertures in the plane of the sulfur atoms were "capped" for the calculation by the addition of a non-covalently



carbons: C1-C2, C2-C5, C5-C8, C8-C11, C11-C14. The angles formed at the intersections of these lines were measured using the Bruker SHELXTL 6.10 software<sup>4</sup>. A Cambridge Crystal Structure Database<sup>5</sup> search yielded 91 structures containing the 4,4'-substituted biphenyl moiety and the measurement procedure was repeated on a selection of on similar structures. These measurements yielded angles similar to those found in As<sub>2</sub>I<sub>2</sub>Cl<sub>2</sub>.

**References:**

<sup>1</sup> T. Nakamura, J. J. Ren, K. M. Zhu, S. Kawara and B. K. Jin, *Anal. Sci.*, 2006, **22**, 1261-1264.

<sup>2</sup> Henkel & Cie GmbH. *Br. Pat.*, 807,720, 1959; *Chem. Abstr.*, 1995, **123**, 2870.

<sup>3</sup> A. Nicholls, K. A. Sharp and B. Honig, *Proteins: Struc., Func. and Genet.*, 1991, **11**, 281-296.

<sup>4</sup> Bruker SMART (Version 5.631), SAINT (Version 6.63) and SHELXTL (Version 6.10), 2000, Bruker AXS Inc., Madison, Wisconsin, USA.

<sup>5</sup> Conquest Version 1.7, February 2005 Release.
